# Supplementary material for: Prognostic evaluation of dirty necrosis and tumor necrosis in gastric cancers
Source: Research Square preprint supplement (doi:10.21203/rs.3.rs-6938668/v1), 2025-07-25
Supplement: Supplementary file 1 [file bd61b1f421b511d7466d672d.xlsx]

## Sheet: Untitled2
dirtynecrosis	extensiverare	tumornecrosis	gender	age	groupage65	groupwho	grouplauren	size	sizegroup	Tüumorrgrade	grupluTstage	pN	LVİ	PNİ	CERBB2	recurrence	recurrencedate	ex	exdate	lastcontoldate	PFS	OS	firstdiagnosisdate	TIL
1	2	0	0	69	2	2	2	3	1	2	2	1	1	0	#NULL!	2	#NULL!	1	#NULL!	2023-11-20	116	116	2023-07-27	2
0	#NULL!	0	0	54	1	1	1	7	2	3	3	3	1	1	1	2	#NULL!	1	#NULL!	2024-02-13	147	147	2023-09-19	0
0	#NULL!	0	0	36	1	2	2	6	2	2	3	3	1	1	1	2	#NULL!	1	#NULL!	2024-02-15	241	241	2023-06-19	0
0	#NULL!	0	1	61	1	1	1	4	1	3	2	2	1	1	1	2	#NULL!	1	#NULL!	2024-03-07	212	212	2023-08-08	0
0	#NULL!	0	0	69	2	1	1	21	2	3	3	3	1	0	1	1	2024-06-12	1	#NULL!	2024-06-21	9	316	2023-08-10	0
0	#NULL!	0	0	53	1	2	2	5	1	3	2	1	1	0	1	2	#NULL!	1	#NULL!	2024-03-07	280	280	2023-06-01	0
1	1	0	0	59	1	2	2	16	2	3	3	3	1	1	1	2	#NULL!	0	2024-04-12	2024-04-12	408	408	2023-03-01	1
0	#NULL!	0	0	69	2	2	2	10	2	2	2	2	0	0	1	2	#NULL!	1	#NULL!	2024-01-04	330	330	2023-02-08	0
0	#NULL!	0	0	72	2	2	2	0.7	1	3	2	2	1	1	1	2	#NULL!	0	2023-10-09	2023-10-09	488	488	2022-06-08	0
0	#NULL!	0	0	57	1	1	1	6	2	3	3	3	1	1	1	2	#NULL!	1	#NULL!	2024-03-02	529	529	2022-09-20	0
1	1	0	0	46	1	2	2	4	1	3	2	3	1	1	2	2	#NULL!	1	#NULL!	2024-02-09	494	494	2022-10-03	1
1	1	1	1	69	2	2	2	7	2	2	2	1	0	0	1	2	#NULL!	1	#NULL!	2024-03-05	543	543	2022-09-09	1
0	#NULL!	0	0	57	1	2	2	2	1	3	3	2	1	1	1	2	#NULL!	1	#NULL!	2024-03-05	575	575	2022-08-08	0
0	#NULL!	0	0	52	1	2	2	8	2	1	3	3	1	1	2	2	#NULL!	0	2023-09-01	2023-09-01	549	549	2022-03-01	0
0	#NULL!	0	0	61	1	1	1	11	2	3	2	3	1	1	1	2	#NULL!	1	#NULL!	2022-12-01	114	114	2022-08-09	0
0	#NULL!	0	1	45	1	2	2	3	1	2	1	1	0	0	1	2	#NULL!	1	#NULL!	2024-02-07	583	583	2022-07-04	0
1	1	0	0	76	2	2	2	11	2	3	3	2	1	1	1	2	#NULL!	1	#NULL!	2023-10-03	475	475	2022-06-15	1
0	#NULL!	0	1	63	1	1	1	15	2	3	3	3	1	1	2	2	#NULL!	0	2022-12-19	2022-12-19	321	321	2022-02-01	0
1	2	0	0	68	2	2	2	5	1	2	2	2	1	1	2	2	#NULL!	1	#NULL!	2024-02-08	619	619	2022-05-30	2
1	2	0	1	67	2	2	2	5	1	2	2	3	1	0	1	1	2022-04-20	1	#NULL!	2023-10-17	545	2269	2017-07-31	2
0	#NULL!	0	0	80	2	1	1	2	1	3	2	3	1	1	1	2	#NULL!	0	2023-01-10	2023-01-10	320	320	2022-02-24	0
1	1	1	1	61	1	2	2	6	2	2	3	3	1	1	1	2	#NULL!	0	2024-11-06	2024-11-06	982	982	2022-02-28	1
0	#NULL!	0	0	61	1	1	1	19	2	3	3	3	1	1	1	1	2022-10-06	0	2023-02-25	2023-02-25	142	389	2022-02-01	0
1	1	0	1	55	1	2	2	0.7	1	1	1	1	0	0	1	2	#NULL!	1	#NULL!	2024-04-03	790	790	2022-02-03	1
0	#NULL!	0	1	71	2	1	1	2	1	3	2	2	1	0	2	1	2024-01-23	1	#NULL!	2024-01-23	0	729	2022-01-24	0
1	1	0	0	65	2	2	2	11	2	3	3	2	1	1	1	2	#NULL!	0	2023-04-10	2023-04-10	551	551	2021-10-06	1
1	1	0	0	74	2	2	2	6	2	3	3	2	1	1	1	2	#NULL!	0	2023-01-19	2023-01-19	#NULL!	#NULL!	#NULL!	1
0	#NULL!	0	0	67	2	2	2	2	1	3	2	2	1	1	1	2	#NULL!	0	2022-03-23	2022-03-23	106	106	2021-12-07	0
1	2	1	1	72	2	2	2	6	2	3	2	2	1	1	2	2	#NULL!	1	#NULL!	2024-02-20	#NULL!	#NULL!	#NULL!	2
1	2	1	1	71	2	2	2	8	2	2	3	2	1	1	2	2	#NULL!	0	2021-12-02	2021-12-02	#NULL!	#NULL!	#NULL!	2
0	#NULL!	0	0	88	2	2	2	0.6	1	2	2	1	0	1	1	1	2021-12-30	1	#NULL!	2024-03-12	803	6936	2005-03-16	0
1	2	1	0	59	1	2	2	9	2	2	3	3	1	1	1	2	#NULL!	0	2022-05-31	2022-05-31	256	256	2021-09-17	2
0	#NULL!	1	0	73	2	1	1	11	2	3	2	2	1	1	1	2	#NULL!	1	#NULL!	2024-02-21	1042	1042	2021-04-15	0
1	2	1	0	59	1	2	2	3	1	2	2	2	1	1	1	2	#NULL!	1	#NULL!	2024-02-26	1505	1505	2020-01-13	2
0	#NULL!	0	1	38	1	1	1	13	2	3	3	3	1	1	#NULL!	2	#NULL!	0	2022-07-04	2022-07-04	314	314	2021-08-24	0
0	#NULL!	0	1	51	1	1	1	5	1	3	3	3	1	0	1	1	2023-06-20	0	2023-12-31	2023-12-31	194	928	2021-06-16	0
0	#NULL!	0	1	49	1	1	1	2	1	3	2	2	1	1	1	1	2023-11-06	1	#NULL!	2024-03-07	122	#NULL!	#NULL!	0
0	#NULL!	0	0	65	2	2	2	8	2	2	3	3	1	1	1	1	2022-06-09	0	2024-01-25	2024-01-25	595	980	2021-05-20	0
1	2	0	1	59	1	2	2	4	1	2	2	1	1	0	2	2	#NULL!	1	#NULL!	2023-10-10	862	862	2021-05-31	2
1	2	1	0	70	2	2	2	6	2	1	3	2	1	1	1	2	#NULL!	0	2021-10-24	2021-10-24	214	214	2021-03-24	2
1	1	1	0	74	2	1	1	4	1	3	3	2	0	1	1	2	#NULL!	1	#NULL!	2024-01-10	1026	1026	2021-03-20	1
0	#NULL!	0	0	62	1	2	2	11	2	2	2	3	1	0	1	2	#NULL!	1	#NULL!	2024-03-12	1111	1111	2021-02-25	0
0	#NULL!	0	0	70	2	2	2	3	1	2	2	1	0	0	1	2	#NULL!	1	#NULL!	2024-01-03	#NULL!	#NULL!	#NULL!	0
0	#NULL!	0	1	65	2	1	1	4	1	3	3	2	1	1	1	1	2023-04-14	0	2023-12-31	2023-12-31	261	1035	2021-03-01	0
0	#NULL!	0	0	65	2	1	1	3	1	3	3	2	1	1	1	2	#NULL!	1	#NULL!	2024-03-05	1096	1096	2021-03-05	0
1	2	0	1	59	1	2	2	5	1	2	1	2	1	0	1	2	#NULL!	1	#NULL!	2024-01-16	1090	1090	2021-01-21	2
0	#NULL!	0	0	56	1	2	2	2	1	3	2	1	1	1	2	2	#NULL!	0	2023-02-27	2023-02-27	755	755	2021-02-02	0
1	1	0	0	66	2	2	2	3	1	1	3	3	1	1	2	2	#NULL!	0	2021-03-02	2021-03-02	40	40	2021-01-21	1
1	2	0	0	62	1	2	2	5	1	2	3	2	1	1	1	2	#NULL!	1	#NULL!	2024-02-16	1138	1138	2021-01-04	2
1	2	0	1	62	1	2	2	8	2	2	3	3	1	0	1	2	#NULL!	1	#NULL!	2024-12-26	#NULL!	#NULL!	#NULL!	2
1	2	0	0	66	2	2	2	7	2	2	3	2	1	1	1	2	#NULL!	1	#NULL!	2024-02-26	1210	1210	2020-11-03	2
0	#NULL!	0	0	70	2	1	1	7	2	3	3	3	1	1	1	1	2021-06-28	0	2021-09-11	2021-09-11	75	#NULL!	#NULL!	0
1	2	1	1	56	1	2	2	7	2	2	2	3	1	1	2	1	2023-02-17	0	2024-03-07	2024-03-07	384	1777	2019-04-26	2
0	#NULL!	0	0	59	1	2	2	6	2	3	3	3	1	1	1	2	#NULL!	0	2021-09-15	2021-09-15	#NULL!	#NULL!	#NULL!	0
1	2	0	1	41	1	2	2	5	1	2	2	3	1	0	1	1	2021-11-22	0	2022-04-06	2022-04-06	135	627	2020-07-18	2
0	#NULL!	0	1	71	2	2	2	17	2	3	3	2	1	0	1	2	#NULL!	0	2020-12-20	2020-12-20	#NULL!	#NULL!	#NULL!	0
0	#NULL!	0	0	40	1	2	2	5	1	3	3	3	1	1	1	2	#NULL!	0	2020-11-18	2020-11-18	170	170	2020-06-01	0
0	#NULL!	0	0	73	2	2	2	2	1	3	2	3	1	1	1	2	#NULL!	0	2023-10-05	2023-10-05	1297	1297	2020-03-17	0
0	#NULL!	0	0	61	1	1	1	4	1	3	2	3	0	1	1	2	#NULL!	0	2020-06-21	2020-06-21	45	45	2020-05-07	0
0	#NULL!	0	0	72	2	2	2	8	2	2	2	3	1	0	1	1	2022-01-04	0	2023-07-31	2023-07-31	573	1221	2020-03-27	0
0	#NULL!	0	0	60	1	2	2	6	2	2	2	3	1	0	1	1	2022-07-19	0	2023-05-22	2023-05-22	307	1176	2020-03-02	0
0	#NULL!	0	0	78	2	1	1	26	2	3	3	3	1	1	1	1	2020-08-11	0	2022-01-02	2022-01-02	509	685	2020-02-17	0
1	1	0	0	57	1	2	2	5	1	2	3	3	1	1	1	1	2022-08-17	0	2024-01-25	2024-01-25	526	1462	2020-01-24	1
0	#NULL!	0	0	70	2	1	1	4	1	3	3	3	1	1	1	2	#NULL!	0	2020-03-21	2020-03-21	64	64	2020-01-17	0
1	2	0	1	70	2	2	2	4	1	2	3	3	1	0	1	2	#NULL!	1	2024-01-22	2024-01-22	#NULL!	#NULL!	#NULL!	2
1	1	0	0	57	1	2	2	8	2	2	2	3	1	1	1	1	2021-05-10	0	2022-05-30	2022-05-30	385	#NULL!	#NULL!	1
1	1	1	0	75	2	2	2	9	2	3	3	3	1	1	1	2	#NULL!	0	2020-01-24	2020-01-24	#NULL!	#NULL!	#NULL!	1
0	#NULL!	0	1	84	2	2	2	6	2	3	3	3	1	1	1	1	2020-09-24	0	2021-03-02	2021-03-02	159	213	2020-08-01	0
0	#NULL!	0	0	57	1	2	2	6	2	1	3	3	1	1	2	1	2021-04-16	0	2022-06-09	2022-06-09	419	#NULL!	#NULL!	0
1	1	0	1	58	1	1	1	3	1	3	2	2	1	0	1	2	#NULL!	1	#NULL!	2022-03-28	878	878	2019-11-01	1
0	#NULL!	0	0	87	2	1	1	13	2	3	3	3	1	1	1	2	#NULL!	0	2021-12-15	2021-12-15	768	768	2019-11-08	0
1	1	0	0	79	2	2	2	3	1	2	2	1	0	0	1	2	#NULL!	1	#NULL!	2024-01-24	#NULL!	#NULL!	#NULL!	0
0	#NULL!	0	1	57	1	2	2	6	2	3	2	2	1	1	1	1	2021-02-25	0	2021-06-08	2021-06-08	103	630	2019-09-17	0
1	2	0	1	67	2	2	2	6	2	2	2	2	1	1	1	2	#NULL!	1	#NULL!	2024-02-20	1616	1616	2019-09-18	2
0	#NULL!	0	1	61	1	2	2	5	1	2	2	2	0	0	1	1	2020-08-14	0	2020-10-08	2020-10-08	55	437	2019-07-29	0
0	#NULL!	0	1	60	1	2	2	6	2	3	3	3	1	1	1	1	2021-05-24	0	2021-06-25	2021-06-25	32	652	2019-09-12	0
0	#NULL!	0	0	75	2	2	2	0.7	1	3	2	2	0	0	1	2	#NULL!	1	#NULL!	2023-12-26	2126	2126	2018-03-01	0
1	1	0	0	58	1	2	2	3	1	2	2	1	0	1	1	2	#NULL!	1	#NULL!	2023-08-04	1506	1506	2019-06-20	1
1	2	0	1	64	1	2	2	4	1	2	2	1	1	0	2	2	#NULL!	1	#NULL!	2024-02-19	1701	1701	2019-06-24	2
0	#NULL!	0	1	76	2	2	2	2	1	1	1	1	0	0	1	2	#NULL!	0	2021-02-12	2021-02-12	737	737	2019-02-06	0
0	#NULL!	0	0	66	2	2	2	7	2	2	2	2	0	0	2	2	#NULL!	1	#NULL!	2019-06-26	#NULL!	#NULL!	#NULL!	0
0	#NULL!	0	0	70	2	2	2	0.4	1	2	2	2	0	0	1	2	#NULL!	1	#NULL!	2023-12-13	1838	1838	2018-12-01	0
0	#NULL!	0	0	36	1	1	1	14	2	3	3	3	1	1	1	2	#NULL!	0	2020-03-15	2020-03-15	383	383	2019-02-26	0
1	2	0	0	71	2	2	2	4	1	2	2	2	1	0	1	2	#NULL!	1	#NULL!	2024-03-04	1782	1782	2019-04-18	2
1	1	0	0	72	2	2	2	7	2	2	2	2	1	1	1	1	2020-10-01	0	2021-05-15	2021-05-15	226	831	2019-02-04	1
1	1	0	1	63	1	2	2	6	2	2	3	2	1	1	1	2	#NULL!	0	2019-09-07	2019-09-07	204	204	2019-02-15	1
0	#NULL!	0	1	77	2	1	1	2	1	3	1	2	1	1	1	2	#NULL!	1	#NULL!	2022-01-04	#NULL!	#NULL!	#NULL!	0
1	2	0	0	64	1	2	2	7	2	2	2	3	0	0	1	2	#NULL!	0	2022-11-13	2022-11-13	1406	1406	2019-01-07	2
1	2	0	1	66	2	2	2	4	1	2	2	2	1	1	1	2	#NULL!	1	#NULL!	2023-12-25	#NULL!	#NULL!	#NULL!	2
1	1	0	0	81	2	2	2	3	1	2	2	2	0	0	2	2	#NULL!	1	#NULL!	2023-06-20	1690	1690	2018-11-03	1
1	2	0	0	80	2	2	2	9	2	2	2	2	1	1	1	2	#NULL!	1	#NULL!	2024-01-04	#NULL!	#NULL!	#NULL!	2
0	#NULL!	0	0	70	2	2	2	3	1	2	2	3	1	0	2	1	2020-01-31	0	2021-01-21	2021-01-21	356	776	2018-12-07	0
0	#NULL!	0	1	62	1	1	1	4	1	3	2	3	1	1	1	2	#NULL!	0	2019-03-29	2019-03-29	#NULL!	#NULL!	#NULL!	0
0	#NULL!	0	0	63	1	2	2	2	1	2	2	2	1	0	2	2	#NULL!	0	2019-10-20	2019-10-20	#NULL!	#NULL!	#NULL!	0
1	1	0	1	69	2	2	2	7	2	2	2	3	0	0	1	2	#NULL!	1	#NULL!	2024-01-17	#NULL!	#NULL!	#NULL!	1
0	#NULL!	0	0	61	1	2	2	3	1	3	2	2	1	1	1	2	#NULL!	0	2022-11-13	2022-11-13	1470	1470	2018-11-04	0
0	#NULL!	1	0	82	2	1	1	5	1	3	3	2	1	1	1	2	#NULL!	1	#NULL!	2024-02-26	#NULL!	#NULL!	#NULL!	0
0	#NULL!	0	0	46	1	2	2	6	2	3	3	3	1	1	1	1	2019-12-16	0	2020-11-09	2020-11-09	329	#NULL!	#NULL!	0
0	#NULL!	0	0	49	1	2	2	3	1	3	2	3	1	1	1	2	#NULL!	1	#NULL!	2024-01-17	#NULL!	1951	2018-09-14	0
0	#NULL!	0	1	54	1	2	2	4	1	3	3	3	1	1	1	1	2021-08-04	0	2022-01-13	2022-01-13	162	1250	2018-08-12	0
0	#NULL!	0	1	52	1	1	1	12	2	3	3	3	1	1	1	2	#NULL!	0	2019-09-12	2019-09-12	433	433	2018-07-06	0
0	#NULL!	0	0	74	2	2	2	2	1	3	3	3	1	1	1	2	#NULL!	1	#NULL!	2024-02-06	2037	2037	2018-07-10	0
0	#NULL!	0	0	68	2	2	2	2	1	1	1	1	0	0	2	2	#NULL!	1	#NULL!	2023-12-28	2030	2030	2018-06-07	0
1	2	0	0	72	2	2	2	6	2	3	2	3	1	0	1	2	#NULL!	0	2023-01-01	2023-01-01	1651	1651	2018-06-25	2
0	#NULL!	0	0	68	2	2	2	5	1	2	3	3	1	0	1	1	2018-11-15	0	2019-04-04	2019-04-04	140	275	2018-07-03	0
0	#NULL!	0	0	74	2	2	2	5	1	2	2	3	0	1	1	2	#NULL!	0	2019-03-12	2019-03-12	282	282	2018-06-03	0
0	#NULL!	0	1	72	2	1	1	6	2	3	2	1	1	1	1	2	#NULL!	0	2019-03-31	2019-03-31	346	346	2018-04-19	0
0	#NULL!	0	1	81	2	2	2	13	2	3	3	3	1	1	1	2	#NULL!	0	2019-01-03	2019-01-03	358	358	2018-01-10	0
0	#NULL!	0	1	61	1	1	1	1	1	3	1	1	0	0	1	2	#NULL!	1	#NULL!	2024-01-09	2140	2140	2018-03-01	0
1	2	0	0	66	2	2	2	6	2	2	2	2	1	1	2	2	#NULL!	0	2018-12-10	2018-12-10	#NULL!	#NULL!	#NULL!	2
0	#NULL!	0	1	61	1	2	2	6	2	3	3	2	1	1	1	2	#NULL!	1	#NULL!	2024-04-22	2280	2280	2018-01-24	0
1	1	0	1	58	1	2	2	2	1	2	1	1	0	0	1	2	#NULL!	1	#NULL!	2024-02-27	2238	2238	2018-01-11	1
1	1	0	0	72	2	2	2	2	1	2	2	3	1	0	1	1	2020-04-02	0	2021-07-03	2021-07-03	457	#NULL!	#NULL!	1
0	#NULL!	0	1	71	2	2	2	4	1	3	2	1	0	0	1	2	#NULL!	0	2018-11-30	2018-11-30	#NULL!	#NULL!	#NULL!	0
0	#NULL!	0	0	61	1	2	2	8	2	3	3	3	1	1	1	2	#NULL!	0	2018-11-06	2018-11-06	334	334	2017-12-07	0
0	#NULL!	0	1	56	1	1	1	6	2	3	3	1	0	0	1	1	2022-04-15	0	2023-01-04	2023-01-04	264	#NULL!	#NULL!	0
0	#NULL!	0	1	29	1	1	1	6	2	3	3	3	1	1	1	1	2018-11-29	0	2019-09-07	2019-09-07	282	#NULL!	#NULL!	0
0	#NULL!	0	0	51	1	2	2	4	1	3	2	2	1	1	2	2	#NULL!	1	#NULL!	2023-10-30	2182	2182	2017-11-08	0
0	#NULL!	0	0	69	2	#NULL!	#NULL!	9	2	1	3	3	1	1	1	2	#NULL!	0	2018-03-29	2018-03-29	240	240	2017-08-01	0
0	#NULL!	0	0	79	2	1	1	4	1	3	3	3	1	1	1	2	#NULL!	0	2018-03-03	2018-03-03	305	305	2017-05-02	0
0	#NULL!	0	0	75	2	1	1	12	2	3	3	3	1	1	1	1	2018-06-20	0	2022-04-19	2022-04-19	1399	1740	2017-07-14	0
0	#NULL!	0	0	67	2	1	1	2	1	3	1	1	1	0	1	2	#NULL!	1	#NULL!	2023-10-10	2318	2318	2017-06-05	0
0	#NULL!	0	1	58	1	1	1	6	2	3	3	3	1	1	1	2	#NULL!	0	2018-04-28	2018-04-28	361	361	2017-05-02	0
1	1	0	0	66	2	2	2	5	1	1	3	2	1	0	2	2	#NULL!	0	2017-05-16	2017-05-16	26	26	2017-04-20	1
1	2	0	0	84	2	2	2	4	1	1	1	1	0	0	2	2	#NULL!	0	2018-10-30	2018-10-30	572	572	2017-04-06	2
0	#NULL!	0	0	54	1	1	1	3	1	3	2	2	1	1	2	2	#NULL!	1	#NULL!	2023-05-02	2269	2269	2017-02-13	0
1	2	0	0	62	1	2	2	7	2	3	2	1	0	0	1	2	#NULL!	1	#NULL!	2023-09-05	2429	2429	2017-01-10	2
0	#NULL!	0	0	74	2	1	1	10	2	3	3	3	1	0	1	2	#NULL!	0	2021-07-03	2021-07-03	1643	1643	2017-01-02	0
0	#NULL!	0	1	68	2	1	1	6	2	3	1	2	0	0	1	1	2018-12-29	0	2019-08-08	2019-08-08	222	#NULL!	#NULL!	0
0	#NULL!	0	1	73	2	2	2	4	1	3	2	3	1	1	1	2	#NULL!	0	2018-03-17	2018-03-17	470	470	2016-12-02	0
0	#NULL!	0	1	76	2	1	1	4	1	3	1	1	0	0	1	2	#NULL!	1	#NULL!	2024-03-20	#NULL!	#NULL!	#NULL!	0
1	2	0	0	62	1	2	2	2	1	2	2	2	1	0	1	2	#NULL!	0	2017-07-13	2017-07-13	#NULL!	#NULL!	#NULL!	2
1	1	0	1	68	2	2	2	2	1	1	1	1	0	0	2	2	#NULL!	1	#NULL!	2024-03-14	#NULL!	#NULL!	#NULL!	1
1	2	0	0	69	2	2	2	0.2	1	1	1	1	0	0	1	2	#NULL!	0	2022-10-19	2022-10-19	2247	2247	2016-08-24	2
0	#NULL!	1	1	59	1	2	2	12	2	3	3	3	1	1	1	2	#NULL!	0	2016-12-07	2016-12-07	170	170	2016-06-20	2
1	1	0	0	78	2	2	2	4	1	1	2	1	0	0	1	2	#NULL!	1	#NULL!	2021-09-21	1829	1829	2016-09-18	1
0	#NULL!	0	0	68	2	2	2	6	2	3	3	3	1	1	1	2	#NULL!	0	2020-09-11	2020-09-11	1502	1502	2016-08-01	0
1	2	1	0	81	2	2	2	6	2	3	2	2	1	1	2	2	#NULL!	0	2021-05-18	2021-05-18	1763	1763	2016-07-20	2
1	1	0	1	80	2	2	2	3	1	1	3	2	1	1	1	2	#NULL!	0	2019-02-07	2019-02-07	924	924	2016-07-28	1
0	#NULL!	0	0	68	2	2	2	5	1	2	2	3	0	1	1	2	#NULL!	0	2017-11-19	2017-11-19	570	570	2016-04-28	0
1	2	1	0	57	1	2	2	5	1	2	2	1	0	0	1	1	2020-08-10	0	2022-11-02	2022-11-02	814	2376	2016-05-01	2
0	#NULL!	1	0	59	1	2	2	6	2	2	2	3	1	1	2	2	#NULL!	0	2016-09-04	2016-09-04	151	151	2016-04-06	0
0	#NULL!	0	1	70	2	2	2	4	1	2	2	3	0	1	#NULL!	2	#NULL!	0	2017-01-12	2017-01-12	260	260	2016-04-27	0
0	#NULL!	0	0	77	2	2	2	6	2	2	2	2	1	0	1	2	#NULL!	1	#NULL!	2023-12-14	2892	2892	2016-01-13	0
0	#NULL!	0	0	66	2	2	2	5	1	2	3	3	1	1	1	2	#NULL!	0	2017-04-20	2017-04-20	403	403	2016-03-13	0
0	#NULL!	0	0	82	2	2	2	3	1	1	2	1	0	1	2	2	#NULL!	0	2024-03-07	2024-03-07	2901	2901	2016-03-28	0
0	#NULL!	0	0	77	2	2	2	3	1	1	2	3	1	1	1	2	#NULL!	0	2019-01-25	2019-01-25	1039	1039	2016-03-22	0
0	#NULL!	0	0	69	2	1	1	13	2	3	3	2	1	1	1	2	#NULL!	0	2017-11-04	2017-11-04	646	646	2016-01-28	0
0	#NULL!	1	0	54	1	2	2	6	2	3	2	2	1	0	1	2	#NULL!	0	2021-11-25	2021-11-25	2124	2124	2016-02-01	0
0	#NULL!	0	0	73	2	2	2	11	2	2	3	3	1	1	1	2	#NULL!	0	2016-06-18	2016-06-18	144	144	2016-01-26	0
1	1	0	0	73	2	2	2	6	2	2	3	1	0	0	1	2	#NULL!	1	#NULL!	2023-11-16	#NULL!	#NULL!	#NULL!	1
0	#NULL!	0	1	68	2	2	2	4	1	3	1	1	0	0	1	2	#NULL!	1	#NULL!	2024-02-27	#NULL!	#NULL!	#NULL!	0
1	2	0	0	63	1	2	2	3	1	2	2	1	0	1	2	2	#NULL!	1	#NULL!	2023-08-31	2860	2860	2015-11-01	2
0	#NULL!	0	0	39	1	2	2	4	1	3	3	2	0	1	1	2	#NULL!	1	#NULL!	2023-10-04	2966	2966	2015-08-21	0
1	2	0	1	22	1	2	2	7	2	3	3	3	0	1	1	2	#NULL!	0	2016-02-28	2016-02-28	198	198	2015-08-14	2
1	1	0	0	52	1	1	1	0.3	1	3	1	3	0	0	1	1	2015-11-21	0	2016-01-02	2016-01-02	42	470	2014-09-19	1
1	2	0	1	54	1	2	2	3	1	1	2	1	0	0	1	2	#NULL!	1	#NULL!	2024-03-12	3212	3212	2015-05-27	2
0	#NULL!	0	1	68	2	2	2	1	1	2	1	1	0	0	1	2	#NULL!	1	#NULL!	2015-04-24	23	23	2015-04-01	0
1	1	0	0	67	2	2	2	2	1	2	2	2	1	1	2	2	#NULL!	1	#NULL!	2023-07-31	3047	3047	2015-03-28	1
0	#NULL!	0	0	41	1	2	2	3	1	1	3	1	0	1	1	2	#NULL!	1	#NULL!	2020-06-16	2170	2170	2014-07-08	0
1	1	0	1	52	1	2	2	4	1	3	3	3	0	0	1	2	#NULL!	0	2015-08-07	2015-08-07	164	164	2015-02-24	1
1	1	0	0	71	2	2	2	5	1	2	2	2	0	0	1	2	#NULL!	1	#NULL!	2024-02-26	3284	3284	2015-03-01	1
0	#NULL!	0	0	58	1	1	1	1	1	1	1	1	0	0	1	2	#NULL!	0	2024-02-06	2024-02-06	#NULL!	#NULL!	#NULL!	0
0	#NULL!	0	0	61	1	2	2	3	1	3	3	2	1	0	1	2	#NULL!	0	2016-01-30	2016-01-30	#NULL!	#NULL!	#NULL!	0
0	#NULL!	0	0	76	2	2	2	2	1	3	3	3	0	0	1	2	#NULL!	0	2016-05-13	2016-05-13	559	559	2014-11-01	0
0	#NULL!	0	1	38	1	1	1	1	1	3	3	1	1	0	1	2	#NULL!	0	2015-04-16	2015-04-16	422	422	2014-02-18	0
0	#NULL!	0	1	44	1	2	2	3	1	2	2	2	0	0	2	2	#NULL!	0	2018-08-31	2018-08-31	1522	1522	2014-07-01	0
0	#NULL!	0	0	77	2	2	2	3	1	3	2	3	1	1	1	2	#NULL!	1	#NULL!	2024-03-20	3622	3622	2014-04-20	0
1	2	0	0	41	1	2	2	7	2	1	2	1	1	1	1	2	#NULL!	1	#NULL!	2024-02-15	3619	3619	2014-03-20	2
1	1	0	1	54	1	2	2	3	1	1	2	1	0	0	1	2	#NULL!	0	2016-06-15	2016-06-15	#NULL!	#NULL!	#NULL!	1
1	1	0	1	75	2	2	2	4	1	1	1	1	1	0	1	2	#NULL!	0	2020-01-29	2020-01-29	#NULL!	#NULL!	#NULL!	1
1	1	0	0	76	2	2	2	7	2	2	2	3	1	1	1	2	#NULL!	0	2016-09-06	2016-09-06	#NULL!	#NULL!	#NULL!	1
0	#NULL!	0	1	57	1	1	1	13	2	3	2	1	1	1	1	2	#NULL!	0	2013-11-12	2013-11-12	42	42	2013-10-01	0
1	1	0	0	78	2	1	1	3	1	2	2	2	0	1	1	2	#NULL!	0	2022-03-04	2022-03-04	3136	3136	2013-08-02	1
1	2	0	1	78	2	2	2	3	1	1	1	1	0	1	1	1	2015-04-06	1	#NULL!	2020-01-23	1753	2421	2013-06-07	2
0	#NULL!	0	0	73	2	2	2	9	2	3	3	3	1	1	1	2	#NULL!	0	2014-12-14	2014-12-14	696	696	2013-01-17	0
0	#NULL!	0	0	68	2	2	2	3	1	3	3	3	1	1	1	2	#NULL!	0	2013-07-11	2013-07-11	26	26	2013-06-15	0
0	#NULL!	0	1	60	1	1	1	5	1	3	2	3	1	1	1	2	#NULL!	0	2013-10-30	2013-10-30	148	148	2013-06-04	0
1	1	0	0	33	1	2	2	8	2	3	3	2	1	1	1	2	#NULL!	0	2017-02-15	2017-02-15	1377	1377	2013-05-10	1
0	#NULL!	0	0	75	2	2	2	5	1	3	3	3	1	1	1	1	2013-05-08	0	2013-10-13	2013-10-13	158	68	2013-08-06	0
1	1	0	0	60	1	2	2	4	1	3	2	1	1	0	1	2	#NULL!	0	2015-05-15	2015-05-15	827	827	2013-02-07	1
0	#NULL!	0	0	79	2	1	1	10	2	3	2	2	1	1	1	2	#NULL!	0	2014-01-22	2014-01-22	275	275	2013-04-22	0
0	#NULL!	0	0	80	2	1	1	9	2	3	3	3	1	1	1	2	#NULL!	0	2013-04-05	2013-04-05	14	14	2013-03-22	0
1	1	0	0	55	1	2	2	1	1	1	1	1	0	0	1	2	#NULL!	1	#NULL!	2024-02-06	4019	4019	2013-02-04	1
0	#NULL!	0	1	71	2	2	2	8	2	3	3	3	1	1	1	2	#NULL!	0	2014-04-15	2014-04-15	428	428	2013-02-11	0
0	#NULL!	1	0	53	1	2	2	3	1	3	2	1	0	0	1	2	#NULL!	0	2019-10-18	2019-10-18	#NULL!	#NULL!	#NULL!	1
1	2	0	0	82	2	2	2	8	2	1	3	2	0	0	2	1	2015-06-26	0	2023-09-17	2023-09-17	3005	3908	2013-01-04	2
